# Supplementary material
Source: MDPI journal article supplement (https://www.mdpi.com/2073-4433/12/2/258)

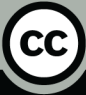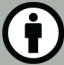

BY

Supplement: s1 [file s1]

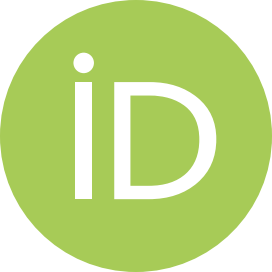

Supplement: s1 [file s1]



*atmosphere*

Supplement: s1 [file s1]
